# Supplementary material for: The age related markers lipofuscin and apoptosis show different genetic architecture by QTL mapping in short-lived Nothobranchius fish
Source: publisher site journal article supplement (doi:10.18632/aging.100660), 2014-05-12
Supplement: Supplementary file [file aging-v6i6-100660-supplementary-material-SD1.pdf]

SUPPLEMENTARY FIGURES

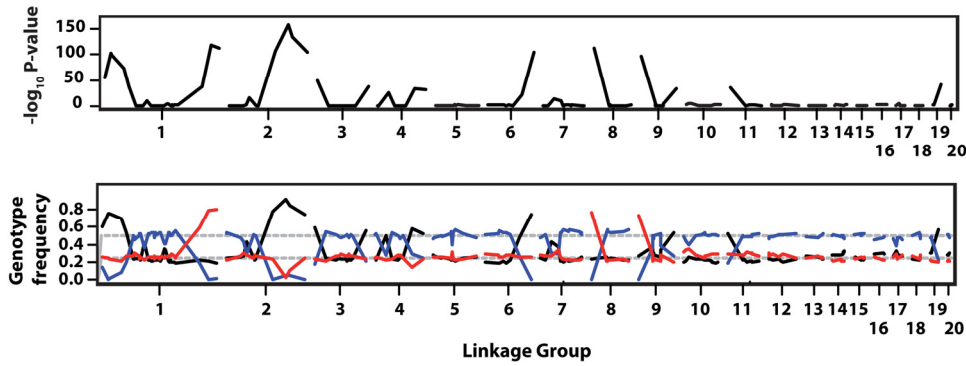

**Figure S1. Transmission ratio distortion QTL.** The top panel shows LGs (x-axis) at which distortion QTL were observed. The bottom panel shows corresponding genotype frequencies across LGs.

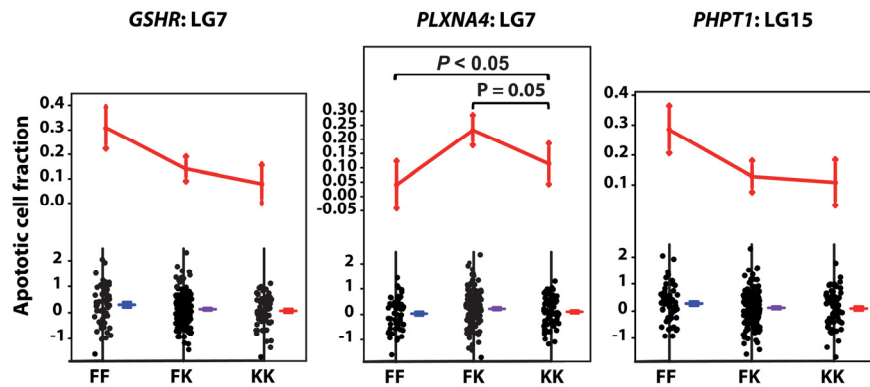

**Figure S2. Allelic effects for suggestive QTL of ACF.** Two QTL effects with additive and under-dominance effects were detected at LG7, and one with additive effect on LG15. The x-axis depicts the three genotypes at each marker – FF refers to  $F_2$  homozygous for *N. furzeri* GRZ allele, FK stands for heterozygous  $F_2$  and KK for  $F_2$  homozygous for the *N. kadleci* allele. Dot plots below each effect plot shows genotype-specific data dispersion at each QTL with mean shown for each. Error bars at each genotype in are standard error of mean.

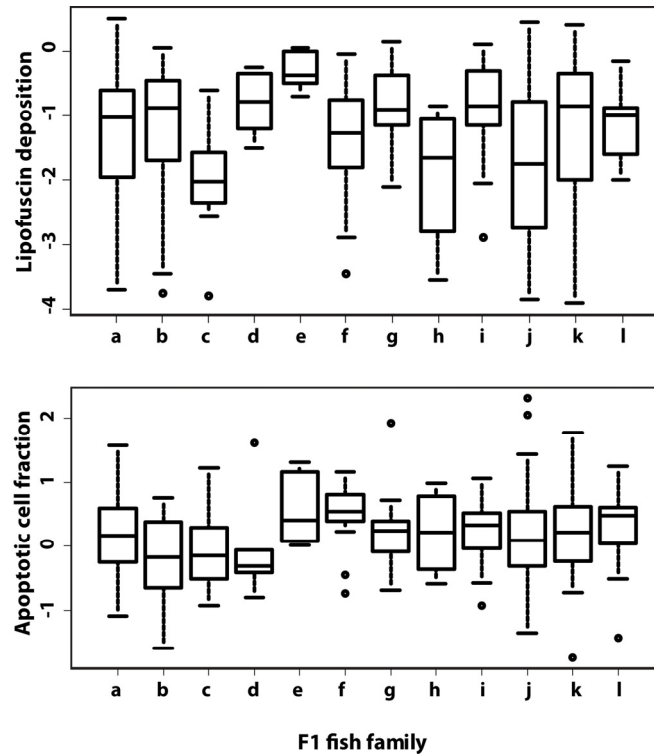

**Figure S3. LFD and ACF in  $F_1$  fish families.** Both lipofuscin deposition (top) and apoptotic cell fraction (bottom) were quantified within each  $F_1$  fish family, showing greater within-family variance in LFD compared to ACF.
